# Supplementary material for: The Tissue Distribution of SARS-CoV-2 in Transgenic Mice With Inducible Ubiquitous Expression of hACE2
Source: Front Mol Biosci. 2022 Jan 18;8:821506. doi: 10.3389/fmolb.2021.821506 (PMC8804232; doi:10.3389/fmolb.2021.821506)
Supplement: Supplementary file 1 [file Table2.XLSX]

## Sheet: Weight
#	S.	Genotype	Tamoxifen	Infection	Experiment duration, days	Wieght, g (day 0)	Wieght, g (day 5)	Wieght, g (day 10)	Weight change, % (day 5)	Weight change, % (day 8)	Weight change, % (day 10)
#1 Rosa-ACE2(Tx)	♀	Rosa-ACE2	+	+	5	16	17.2		7.5
#2 Rosa-ACE2(Tx)	♀	Rosa-ACE2	+	+	5	19	21.6		13.6842
#3 Rosa-ACE2(Tx)	♀	Rosa-ACE2	+	+	5	21	23.5		11.9048
#4 Rosa-ACE2(Tx)	♀	Rosa-ACE2	+	+	5	11	13.7		24.5455
#5 Rosa-ACE2(Tx)	♂	Rosa-ACE2	+	+	5	28.5	27.2		-4.5614
#6 Rosa-ACE2(Tx)	♂	Rosa-ACE2	+	+	5	25.4	23.1		-9.05512
#7 Rosa-ACE2(Tx)	♀	Rosa-ACE2	+	+	10	23.8	23.1	22.4	-2.94118		-5.88235
#8 Rosa-ACE2(Tx)	♀	Rosa-ACE2	+	+	10	19.1	18.8	18.8	-1.57068		-1.57068
#9 Rosa-ACE2(Tx)	♂	Rosa-ACE2	+	+	10	26	25.4	25.7	-2.30769		-1.15385
#1 Rosa-ACE2	♀	Rosa-ACE2	no administration	+	5	18.1	17.8		-1.65746
#2 Rosa-ACE2	♀	Rosa-ACE2	no administration	+	10	22.6	21.6	21.6	-4.42478		-4.42478
#1 UBC-ACE2(Tx)	♀	UBC-ACE2	+	+	5	19.6	15		-23.4694
#2 UBC-ACE2(Tx)	♀	UBC-ACE2	+	+	5	18.8	14.9		-20.7447
#3 UBC-ACE2(Tx)	♂	UBC-ACE2	+	+	10 (death on the 8th day)	27.2	21.5		-20.9559
#4 UBC-ACE2(Tx)	♂	UBC-ACE2	+	+	10 (death on the 5th day)	25.4	19.1		-24.8031
#5 UBC-ACE2(Tx)	♀	UBC-ACE2	+	+	10 (death on the 5th day)	21.7	19.9	14 (on day 8)	-8.29493	35.4839
#6 UBC-ACE2(Tx)	♂	UBC-ACE2	+	+	5 (death on the 5th day)	21	15.5		-26.1905
#7 UBC-ACE2(Tx)	♂	UBC-ACE2	+	+	5 (death on the 5th day)	30.8	22.3		-27.5974
#8 UBC-ACE2(Tx)	♂	UBC-ACE2	+	+	10 (death on the 5th day)	24.3	17.8		-26.749
#1 UBC-ACE2(Tx) uninfected	♂	UBC-ACE2	+	NO	5	no info	no info	no info	no info	no info	no info
#2 UBC-ACE2(Tx) uninfected	♂	UBC-ACE2	+	NO	10	no info	no info	no info	no info	no info	no info
#1 UBC-ACE2	♂	UBC-ACE2	no administration	+	5	28.9	29		0.346021
#2 UBC-ACE2	♂	UBC-ACE2	no administration	+	10	28.2	28.6	28.7	1.41844		1.77305
#1 WT	♀	Wild type	+	+	5	20	21.6		8
#2 WT	♀	Wild type	+	+	5	20	21.7		8.5
#3 WT	♀	Wild type	+	+	5	17	19.1		12.3529
#4 WT	♀	Wild type	+	+	5	17.8	17.7		-0.561798
#5 WT	♂	Wild type	+	+	5	22	24.6		11.8182
#6 WT	♂	Wild type	+	+	5	21	22.5		7.14286
#7 WT	♀	Wild type	+	+	10	21.5	20.8	19.8	-3.25581		-7.90698
#8 WT	♀	Wild type	+	+	10	18.2	19.2	19.9	5.49451		9.34066
#9 WT	♂	Wild type	+	+	10	19.3	19.3	19.6	0		1.5544
#1 WT uninfected	♀	Wild type	+	NO	5	no info	no info	no info	no info	no info	no info
#2 WT uninfected	♀	Wild type	+	NO	10	no info	no info	no info	no info	no info	no info
