# Supplementary material for: The Tissue Distribution of SARS-CoV-2 in Transgenic Mice With Inducible Ubiquitous Expression of hACE2
Source: Front Mol Biosci. 2022 Jan 18;8:821506. doi: 10.3389/fmolb.2021.821506 (PMC8804232; doi:10.3389/fmolb.2021.821506)
Supplement: Supplementary file 2 [file Table3.XLSX]

## Sheet: PCR&FFU
	Supplementary table 3. SARS-CoV-2 genome equivalent number and focus-forming unit analysis
#	S.	Genotype	Tamoxifen	Infection	Experiment duration, days	Brain, virus copy number	Weight of brain sample, g	Normalized data, brain	Heart, virus copy number	Weight of heart sample, g	Normalized data, heart	Lung, virus copy number	Weight of lung sample, g	Normalized data, lung	Liver, virus copy number	Weight of liver sample, g	Normalized data, liver	Small intestine, virus copy number	Weight of Small intestine sample, g	Normalized data, Small intestine	Large intestine, virus copy number	Weight of Large intestine, g	Normalized data, Large intestine	Brain, FFU	Weight of brain sample, g	Normalized FFU, brain	Lung, FFU	Weight of lung sample, g	Normalized FFU, lung
#1 Rosa-ACE2(Tx)	♀	Rosa-ACE2	+	+	5	0	0.2333	0	0	0.07	0	0	0.2023	0	0	0.1448	0	0	0.1137	0	0	0.1563	0	0	0.2333	0	0	0.2023	0
#2 Rosa-ACE2(Tx)	♀	Rosa-ACE2	+	+	5	0	0.1926	0	0	0.0907	0	37	0.109	339.45	0	0.1818	0	0	0.1625	0	0	0.1312	0	0	0.1926	0	0	0.109	0
#3 Rosa-ACE2(Tx)	♀	Rosa-ACE2	+	+	5	0	0.3095	0	0	0.1304	0	2933	0.1108	26471.1	0	0.2825	0	0	0.1362	0	0	0.2161	0	0	0.3095	0	20	0.1108	180.505
#4 Rosa-ACE2(Tx)	♀	Rosa-ACE2	+	+	5	0	0.0638	0	0	0.0456	0	38	0.0267	1423.22	0	0.0747	0	0	0.0398	0	0	0.0474	0	0	0.0638	0	400	0.0267	14981.3
#5 Rosa-ACE2(Tx)	♂	Rosa-ACE2	+	+	5	0	0.2188	0	0	0.05984	0	58	0.0846	685.579	0	0.1866	0	0	0.1385	0	0	0.1718	0	0	0.2188	0	0	0.0846	0
#6 Rosa-ACE2(Tx)	♂	Rosa-ACE2	+	+	5	0	0.0744	0	0	0.0539	0	47	0.0333	1411.41	0	0.0678	0	0	0.0894	0	0	0.0977	0	0	0.0744	0	20	0.0333	600.601
#7 Rosa-ACE2(Tx)	♀	Rosa-ACE2	+	+	10	0	0.2094	0	0	0.1243	0	0	0.1546	0	0	0.1342	0	0	0.1532	0	0	0.1432	0	0	0.2094	0	0	0.1546	0
#8 Rosa-ACE2(Tx)	♀	Rosa-ACE2	+	+	10	0	0.2006	0	0	0.0717	0	0	0.0656	0	0	0.0623	0	0	0.084	0	0	0.1717	0	0	0.2006	0	0	0.0656	0
#9 Rosa-ACE2(Tx)	♂	Rosa-ACE2	+	+	10	0	0.1914	0	0	0.0843	0	1	0.0798	12.5313	0	0.1099	0	0	0.096	0	0	0.0815	0	0	0.1914	0	0	0.0798	0
#1 Rosa-ACE2	♀	Rosa-ACE2	no administration	+	5	0	0.0985	0	0	0.0231	0	0	0.0029	0	0	0.0236	0	0	0.0333	0	0	0.036	0	60	0.0985	609.137	0	0.0029	0
#2 Rosa-ACE2	♀	Rosa-ACE2	no administration	+	10	0	0.1905	0	0	0.0528	0	0	0.0667	0	0	0.106	0	0	0.1165	0	0	0.1097	0	0	0.1905	0	0	0.0667	0
#1 UBC-ACE2(Tx)	♀	UBC-ACE2	+	+	5	140601	0.1218	1.15436e+06	0	0.0531	0	408	0.092	4434.78	0	0.0566	0	0	0.0418	0	0	0.09	0	150000	0.1218	1.23153e+06	170	0.092	1847.83
#2 UBC-ACE2(Tx)	♀	UBC-ACE2	+	+	5	304871	0.1145	2.66263e+06	33	0.0352	937.5	562	0.0194	28969.1	0	0.0827	0	0	0.0948	0	0	0.0502	0	250000	0.1145	2.18341e+06	290	0.0194	14948.5
#3 UBC-ACE2(Tx)	♂	UBC-ACE2	+	+	10 (death on the 8th day)	13391	0.2501	53542.6	31	0.0451	687.361	917	0.0787	11651.8	0	0.0616	0	0	0.088	0	0	0.0597	0	60000	0.2501	239904	50	0.0787	635.324
#4 UBC-ACE2(Tx)	♂	UBC-ACE2	+	+	10 (death on the 5th day)	330548	0.1417	2.33273e+06	82	0.0917	894.22	1157	0.1368	8457.6	0	0.1607	0	264	0.1307	2019.89	0	0.1053	0	500000	0.1417	3.52858e+06	400	0.1368	2923.98
#5 UBC-ACE2(Tx)	♀	UBC-ACE2	+	+	10 (death on the 5th day)	374469	0.143	2.61866e+06	1100	0.1177	9345.79	2151	0.1324	16246.2	39	0.1457	267.673	0	0.0496	0	0	0.1426	0	470000	0.143	3.28671e+06	4000	0.1324	30211.5
#6 UBC-ACE2(Tx)	♂	UBC-ACE2	+	+	5 (death on the 5th day)	517075	0.2305	2.24328e+06	29	0.0932	311.159	1132	0.1353	8366.59	0	0.0895	0	31	0.1818	170.517	30	0.09	333.333	1100000	0.2305	4.77223e+06	120	0.1353	886.918
#7 UBC-ACE2(Tx)	♂	UBC-ACE2	+	+	5 (death on the 5th day)	358663	0.1074	3.33951e+06	0	0.062	0	557	0.0658	8465.05	0	0.0629	0	0	0.0617	0	0	0.0679	0	700000	0.1074	6.51769e+06	540	0.0658	8206.69
#8 UBC-ACE2(Tx)	♂	UBC-ACE2	+	+	10 (death on the 5th day)	490694	0.1438	3.41234e+06	1087	0.0683	15915.1	1928	0.1037	18592.1	46	0.0806	570.72	0	0.0606	0	0	0.1002	0	490000	0.1438	3.40751e+06	1000	0.1037	9643.2
#1 UBC-ACE2(Tx) uninfected	♂	UBC-ACE2	+	NO	5	no info	no info	no info	no info	no info	no info	no info	no info	no info	no info	no info	no info	no info	no info	no info	no info	no info	no info	no info	no info	no info	no info	no info	no info
#2 UBC-ACE2(Tx) uninfected	♂	UBC-ACE2	+	NO	10	no info	no info	no info	no info	no info	no info	no info	no info	no info	no info	no info	no info	no info	no info	no info	no info	no info	no info	no info	no info	no info	no info	no info	no info
#1 UBC-ACE2	♂	UBC-ACE2	no administration	+	5	0	0.1644	0	0	0.1438	0	0	0.0478	0	0	0.117	0	0	0.1128	0	0	0.0617	0	90	0.1644	547.445	0	0.0478	0
#2 UBC-ACE2	♂	UBC-ACE2	no administration	+	10	0	0.137	0	0	0.2024	0	0	0.0865	0	0	0.065	0	0	0.1146	0	0	0.134	0	0	0.137	0	0	0.0865	0
#1 WT	♀	Wild type	+	+	5	0	0.158	0	0	0.0438	0	0	0.037	0	0	0.032	0	0	0.0812	0	0	0.0828	0	0	0.158	0	0	0.037	0
#2 WT	♀	Wild type	+	+	5	0	0.3063	0	0	0.1116	0	0	0.118	0	0	0.3313	0	0	0.2473	0	0	0.2672	0	0	0.3063	0	0	0.118	0
#3 WT	♀	Wild type	+	+	5	0	0.2028	0	0	0.0737	0	0	0.1235	0	0	0.2563	0	0	0.1637	0	0	0.1783	0	0	0.2028	0	0	0.1235	0
#4 WT	♀	Wild type	+	+	5	0	0.2112	0	0	0.137	0	0	0.131	0	0	0.2316	0	0	0.1142	0	0	0.1233	0	0	0.2112	0	0	0.131	0
#5 WT	♂	Wild type	+	+	5	0	0.2488	0	0	0.0973	0	0	0.1167	0	0	0.265	0	0	0.1724	0	0	0.3277	0	0	0.2488	0	0	0.1167	0
#6 WT	♂	Wild type	+	+	5	0	0.1604	0	0	0.0629	0	0	0.1659	0	0	0.115	0	0	0.1287	0	0	0.146	0	0	0.1604	0	0	0.1659	0
#7 WT	♀	Wild type	+	+	10	0	0.1538	0	0	0.0296	0	0	0.0833	0	0	0.0976	0	0	0.0776	0	0	0.099	0	0	0.1538	0	0	0.0833	0
#8 WT	♀	Wild type	+	+	10	0	0.1762	0	0	0.0617	0	0	0.1174	0	0	0.076	0	0	0.0931	0	0	0.0896	0	0	0.1762	0	0	0.1174	0
#9 WT	♂	Wild type	+	+	10	0	0.1792	0	0	0.0449	0	0	0.0588	0	0	0.1264	0	0	0.0704	0	0	0.1641	0	0	0.1792	0	0	0.0588	0
#1 WT uninfected	♀	Wild type	+	NO	5	no info	no info	no info	no info	no info	no info	no info	no info	no info	no info	no info	no info	no info	no info	no info	no info	no info	no info	no info	no info	no info	no info	no info	no info
#2 WT uninfected	♀	Wild type	+	NO	10	no info	no info	no info	no info	no info	no info	no info	no info	no info	no info	no info	no info	no info	no info	no info	no info	no info	no info	no info	no info	no info	no info	no info	no info
